# Supplementary material for: Chirality induction to porphyrin derivatives co-confined at the air–water interface with silica nano-helices: towards enantioselective thin solid film surfaces
Source: Royal Society of Chemistry journal article supplement (doi:10.1039/d4nr02344g), 2024-01-01
Supplement: d4nr02344g1.pdf [file d4nr02344g1.pdf]

## SUPPLEMENTARY INFORMATION

### Chirality induction to porphyrin derivatives co-confined at air-water interface with silica nano helices: towards enantioselective thin solid film surfaces

Michela Ottolini<sup>a</sup>, Zakaria Anfar<sup>b</sup>, Nitika Grover<sup>c</sup>, Gabriele Magna<sup>d</sup>, Manuela Stefanelli<sup>d</sup>, Roberto Paolesse<sup>d</sup>, Mathias O. Senge<sup>c,e</sup>, Simona Bettini<sup>a\*</sup>, Ludovico Valli<sup>a\*</sup>, Reiko Oda<sup>b,f</sup>, Gabriele Giancane<sup>g</sup>

<sup>a</sup> Department of Biological and Environmental Sciences and Technologies (DiSTeBA), Campus Ecotekne, University of Salento, Via per Monteroni, 73100 Lecce (Italy)

<sup>b</sup> Univ. Bordeaux, CNRS, Bordeaux INP, CBMN, UMR 5248, F-33600 Pessac, France

<sup>c</sup> School of Chemistry, Chair of Organic Chemistry, Trinity College Dublin, The University of Dublin, Trinity Biomedical Sciences Institute, 152-160 Pearse Street, Dublin, D02R590, Ireland

<sup>d</sup> Department of Chemical Science and Technologies, University of Rome Tor Vergata, Via Della Ricerca Scientifica 1, 00133 Rome, Italy

<sup>e</sup> Institute for Advanced Study (TUM-IAS), Focus Group – Molecular and Interfacial Engineering of Organic Nanosystem, Technical University of Munich, Lichtenbergstrasse 2a, 85748 Garching, Germany

<sup>f</sup> WPI-Advanced Institute for Materials Research, Tohoku University, Katahira, Aoba-Ku, 980-8577 Sendai, Japan

<sup>g</sup> Department of Cultural Heritage, University of Salento, Via D. Birago 84, 73100 Lecce (Italy)

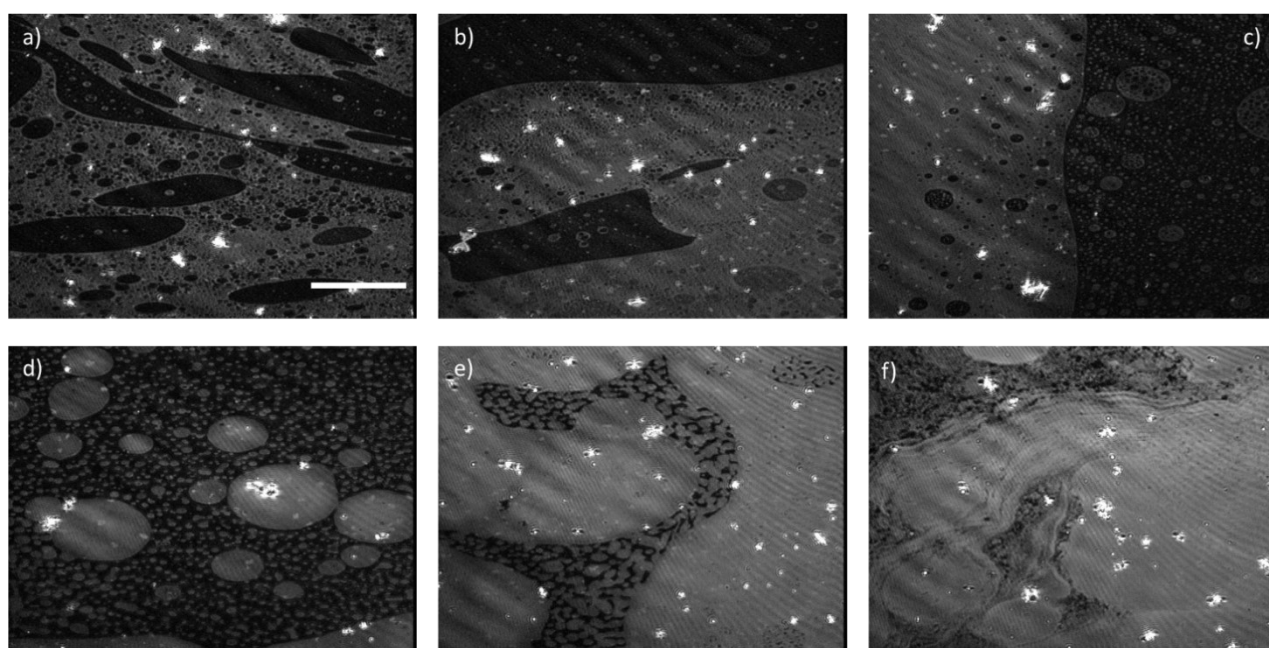

Figure S1. BAM images of the Pp floating film spread on the ultrapure water subphase acquired at different surface pressure values (a: 0 mN/m, b: 5 mN/m, c: 15 mN/m, d: 20 mN/m, e: 25 mN/m, f: 35 mN/m). The bar length is 100  $\mu\text{m}$ .

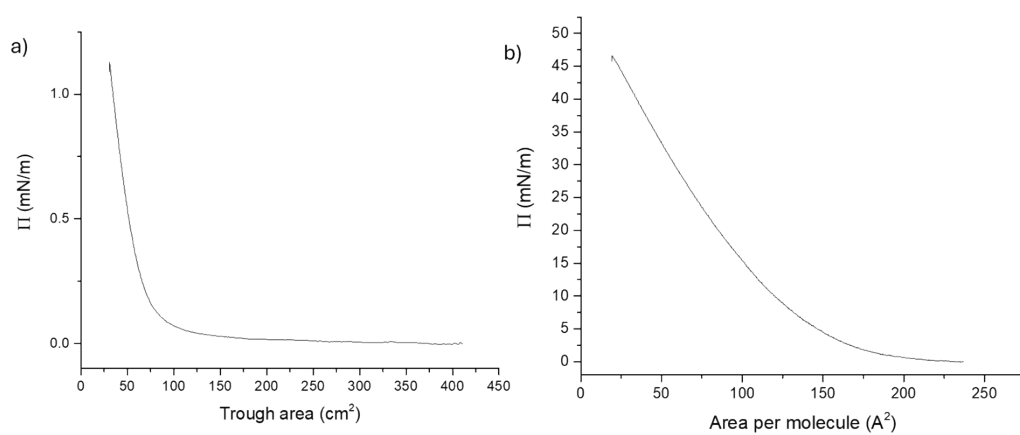

Figure S2. Surface pressure variation (mN/m) as a function of the area per molecule (Å<sup>2</sup>) of the Langmuir films of Pp spread on a) 0.1 mg/L and b) 6 mg/L subphase containing helices.

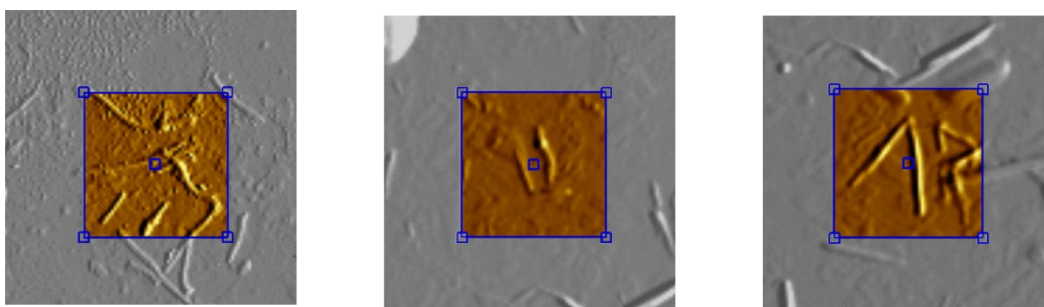

Figure S3. AFM images acquired onto three different points of a sample obtained using Pp as a floating film and 0.1 mg/L subphase containing helices. Blue squares are 2x2 μm<sup>2</sup> area.

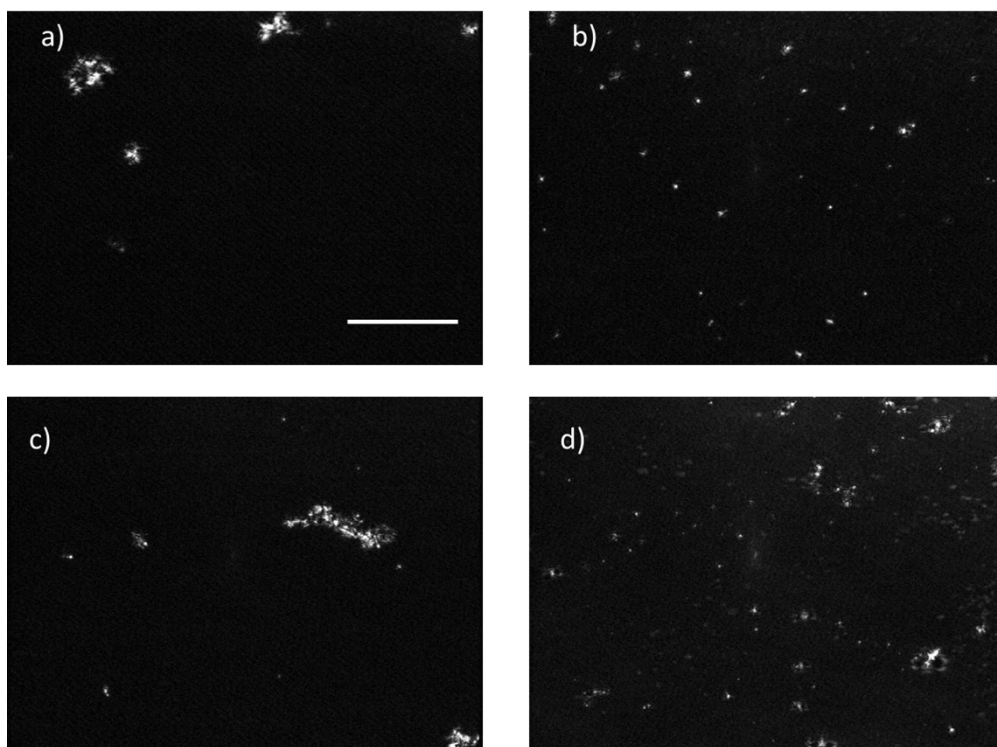

Figure S4. BAM images of the Pp floating film spread on the ultrapure water subphase containing LHH-NH<sub>2</sub>. The images were acquired at different surface pressure values (a: 0 mN/m, b: 10 mN/m, c: 20 mN/m, d: 30 mN/m). The bar length is 100  $\mu$ m.

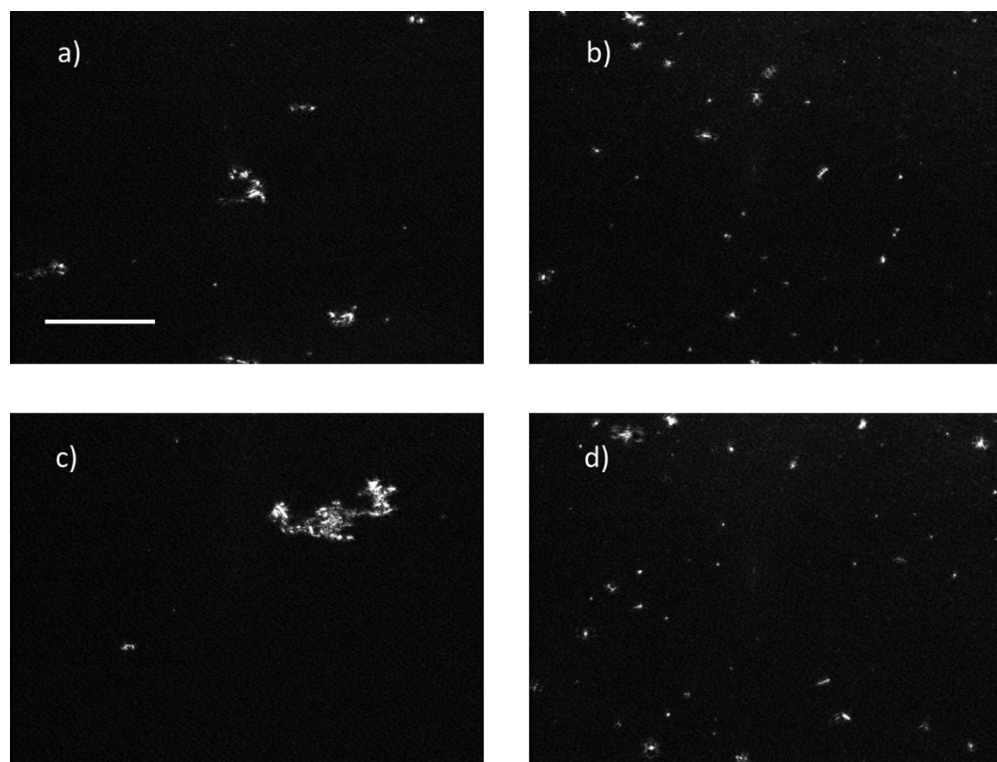

Figure S5. BAM images of the Pp floating film spread on the ultrapure water subphase containing RHH-NH<sub>2</sub>. The images were acquired at different surface pressure values (a: 0 mN/m, b: 10 mN/m, c: 20 mN/m, d: 30 mN/m). The bar length is 100  $\mu$ m.

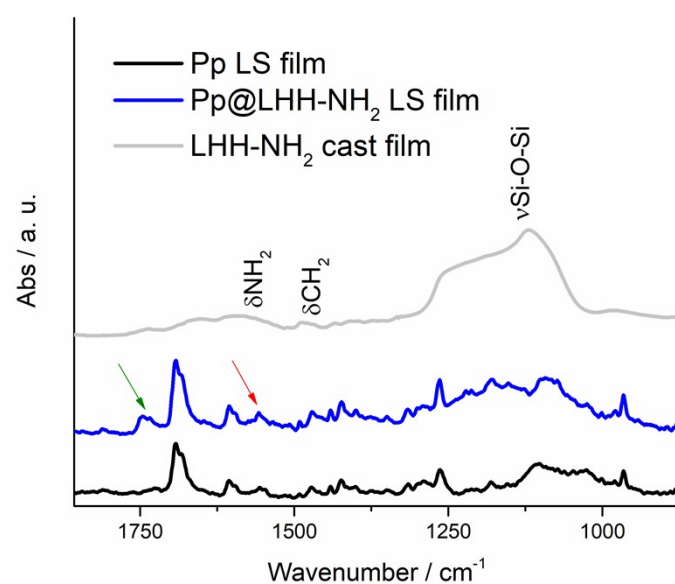

Figure S6. FTIR spectra of silica nano-helices cast film and Pp@LHH-NH<sub>2</sub> and Pp LS films in the range 1850-750  $\text{cm}^{-1}$ .

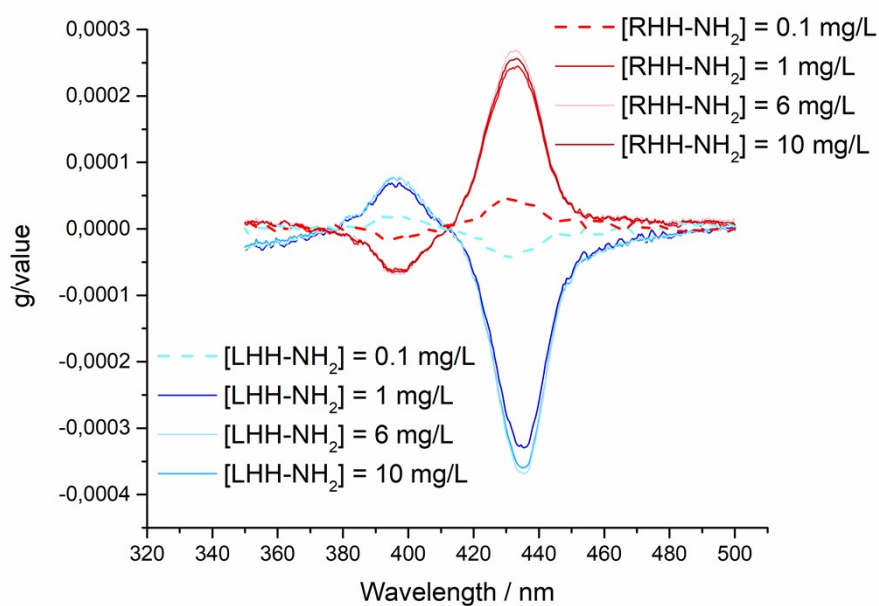

Figure S7. g-factor for the Pp@RHH-NH<sub>2</sub> (red lines) and Pp@LHH-NH<sub>2</sub> adducts (blue lines) obtained by suspending 0.1 mg/L, 1 mg/L, 6 mg/L, and 10 mg/L.

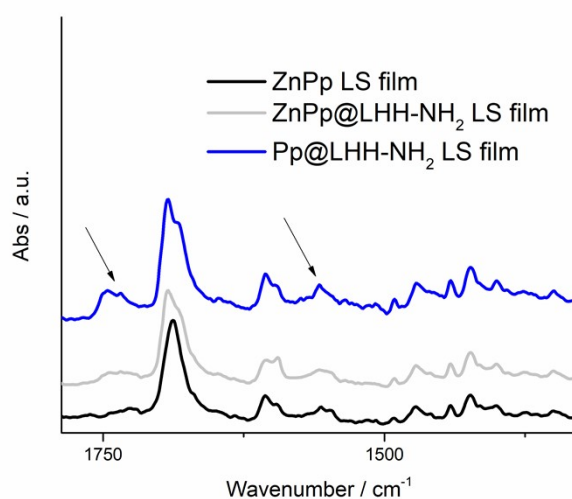

Figure S8. FTIR spectra of the LS films of ZnPp (black line), ZnPp@LHH-NH<sub>2</sub> (grey spectrum) and Pp@LHH@NH<sub>2</sub> in the region 1800-1350 cm<sup>-1</sup>.

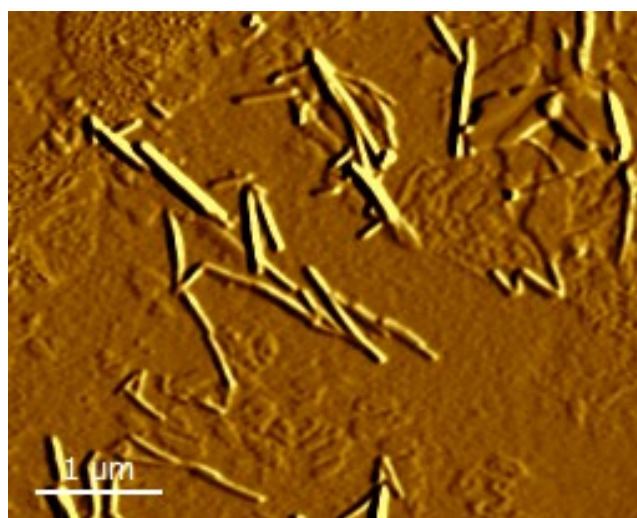

Figure S9. AFM morphology of LS film (1 layer) obtained by transferring ZnPp floating film spread on subphase containing LHH-NH<sub>2</sub>.

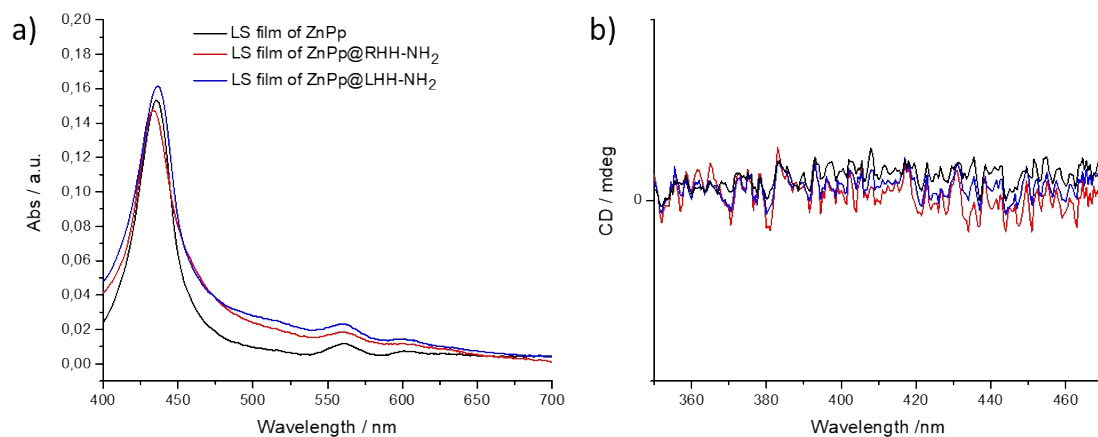

Figure S10. a) UV-Visible spectrum of ZnPp LS films transferred from ultrapure water (black line), from subphase containing RHH-NH<sub>2</sub> (red line) and LHH-NH<sub>2</sub> (blue line) and b) circular dichroism spectra of ZnPp films transferred from ultrapure water subphase (black line), from subphase containing RHH-NH<sub>2</sub> (red line) and LHH-NH<sub>2</sub> (blue line).

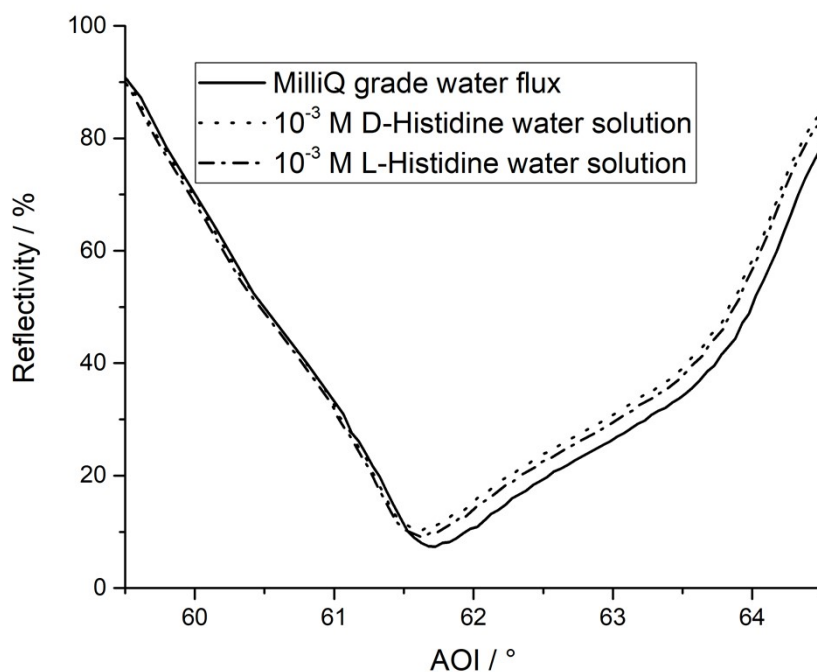

Figure S11. SPR curves of Pp LS film exposed to the two histidine enantiomer solutions at a concentration of 10<sup>-3</sup> M.

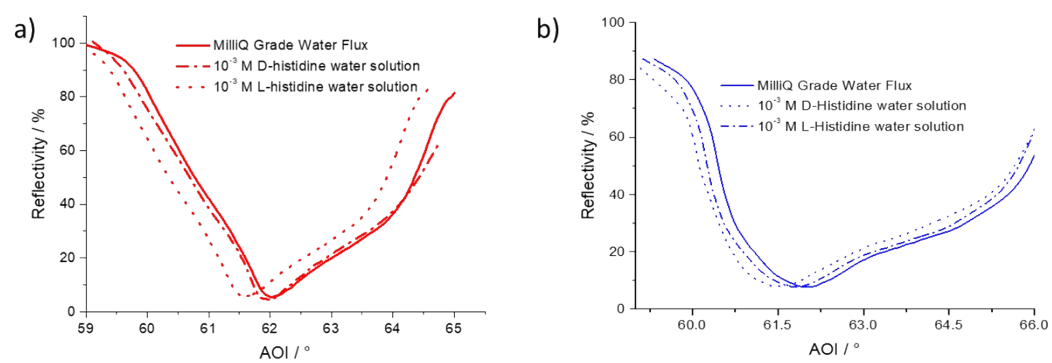

Figure S12. SPR curves of a) Pp@RHH-NH2 and b) Pp@LHH-NH2 exposed to the two histidine enantiomer solutions at a concentration of  $10^{-3}$  M.
